# Supplementary material for: A biocompatible open-surface droplet manipulation platform for detection of multi-nucleotide polymorphism
Source: Royal Society of Chemistry journal article supplement (doi:10.1039/c4lc00089g), 2014-01-01
Supplement: c4lc00089g1.pdf [file c4lc00089g1.pdf]

Electronic Supplementary Information (ESI)

## A biocompatible open-surface droplet manipulation platform for detection of multi-nucleotide polymorphism

C. J. Huang,<sup>a</sup> W. F. Fang,<sup>a</sup> M. S. Ke,<sup>a</sup> H. Y. E. Chou,<sup>b\*</sup> and J. T. Yang<sup>a,\*</sup>

<sup>a</sup>Department of Mechanical Engineering, National Taiwan University, Taipei 106, Taiwan.

<sup>b</sup>Graduate Institute of Oral Biology, School of Dentistry, College of Medicine;  
National Taiwan University, Taiwan

The deformation depth of PDMS membrane was measured by color 3D laser scanning microscope (VK-9700, Keyence Corp., US). Fig. S1 shows the relationship between the working pressure and deformation depth of a PDMS membrane

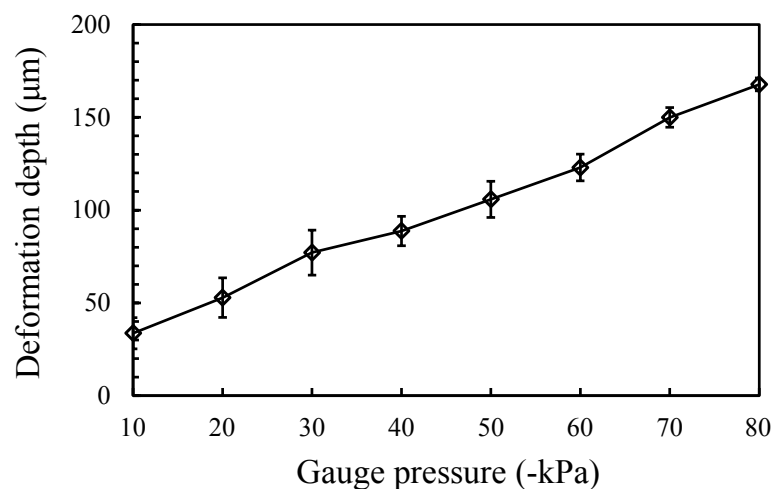

Fig. S1 The relationship between the working pressure and deformation of a PDMS membrane
